# Supplementary material
Source: PubMed Central journal article supplement (PMC6791123)
Supplement: NIHMS1053933-supplement-Figure_S1.pdf [file NIHMS1053933-supplement-Figure_S1.pdf]

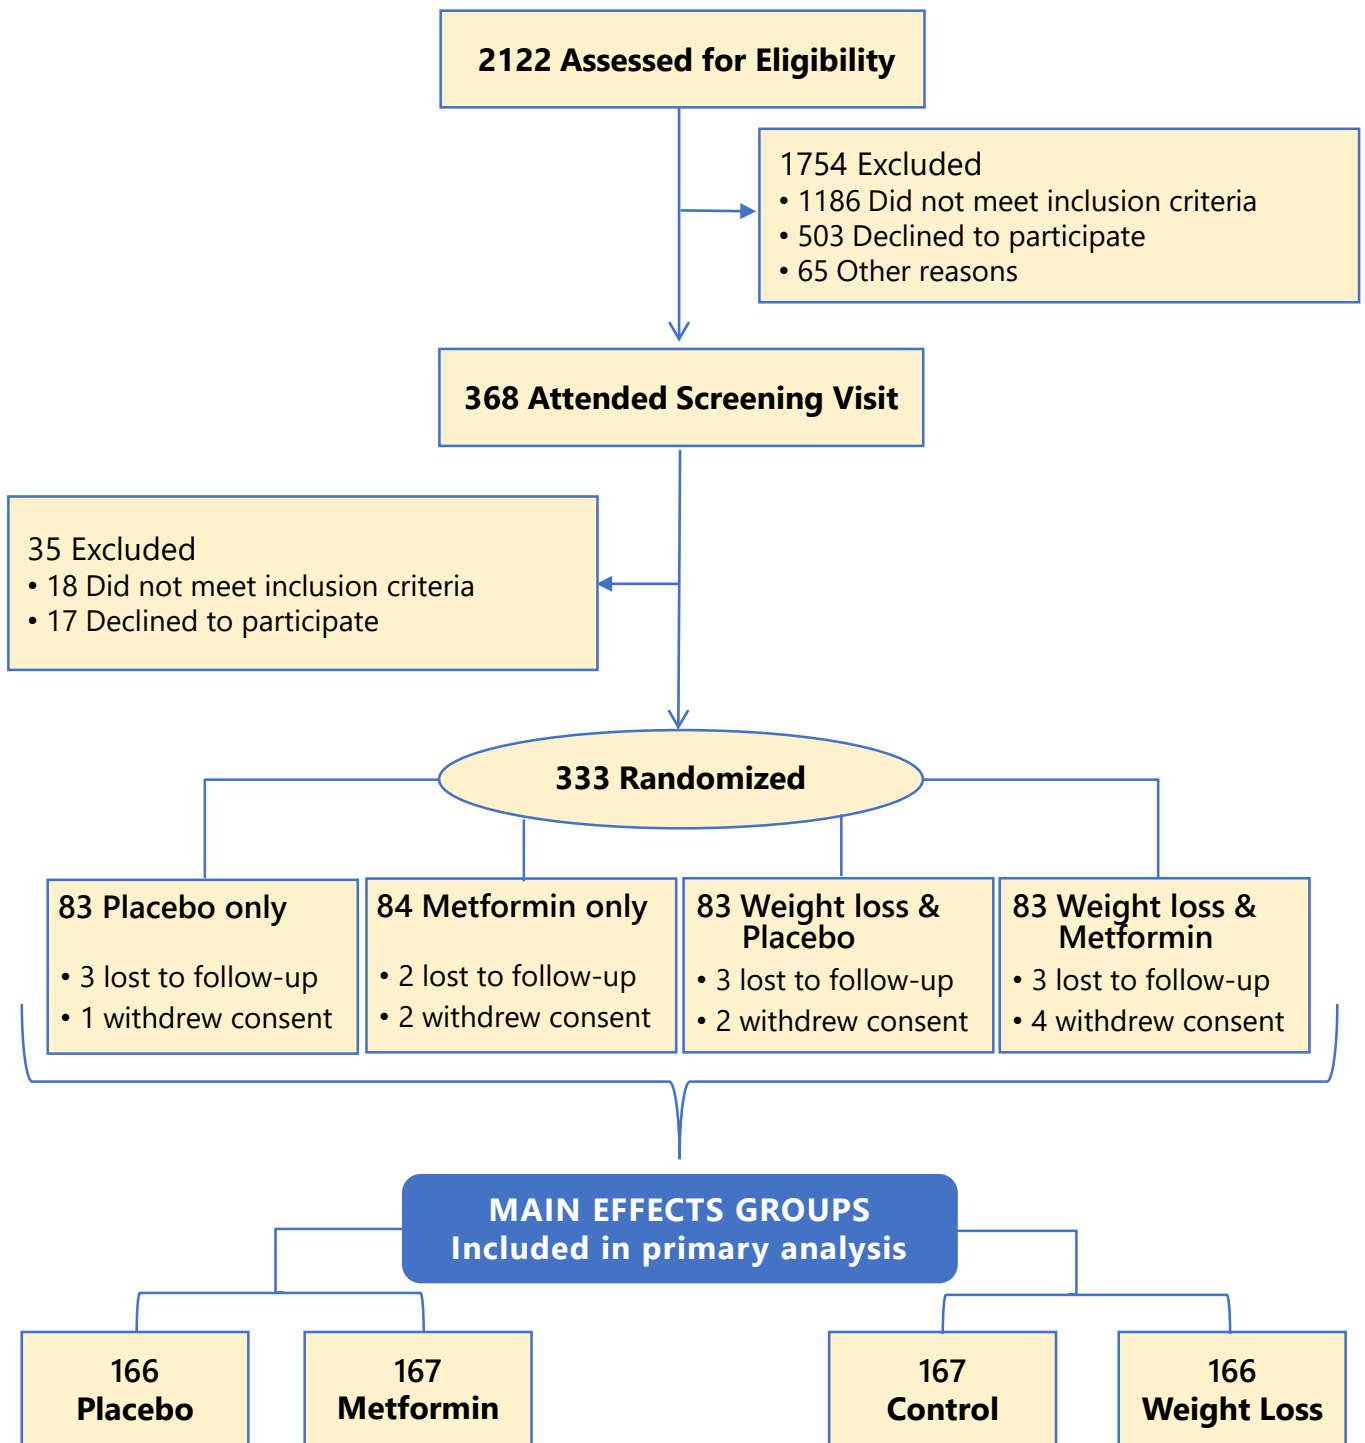

**Figure 1.** Consort Diagram for 2x2 Factorial Randomized Controlled Trial of Metformin and Weight Loss Among Breast Cancer Survivors
